# Supplementary material for: Upcycling of Cr-Containing Sulfate Waste into Efficient FeCrO3/Fe2O3 Catalysts for CO2 Hydrogenation Reaction
Source: MDPI journal article supplement (doi:10.3390/ma17071598), 2024-03-31
Supplement: s1 [file s1]

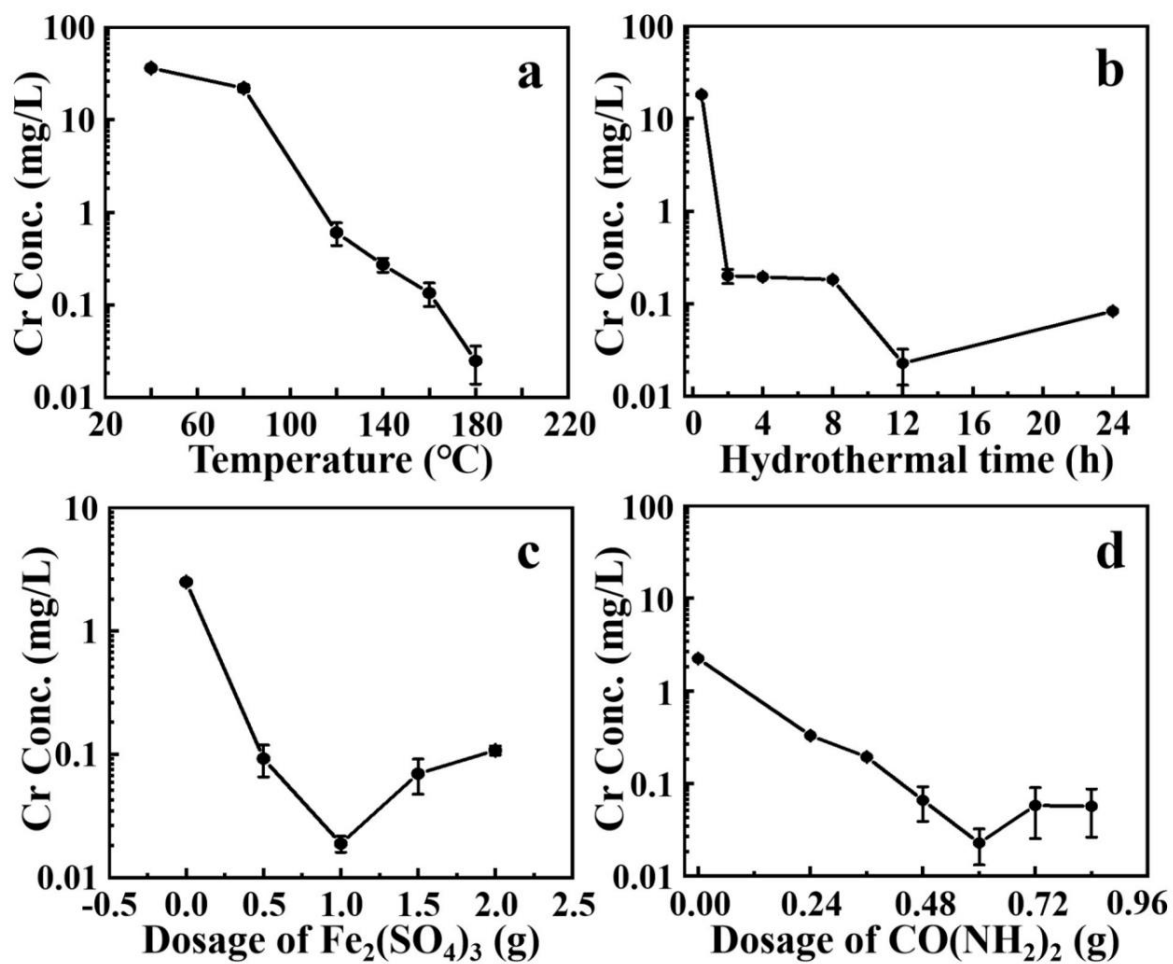

Fig. S1 Total Cr content in hydrothermal solution at different (a) reaction temperature, (b) reaction time, (c) dosage of  $\text{Fe}_2(\text{SO}_4)_3$  and (d) dosage of  $\text{CO}(\text{NH}_2)_2$ .

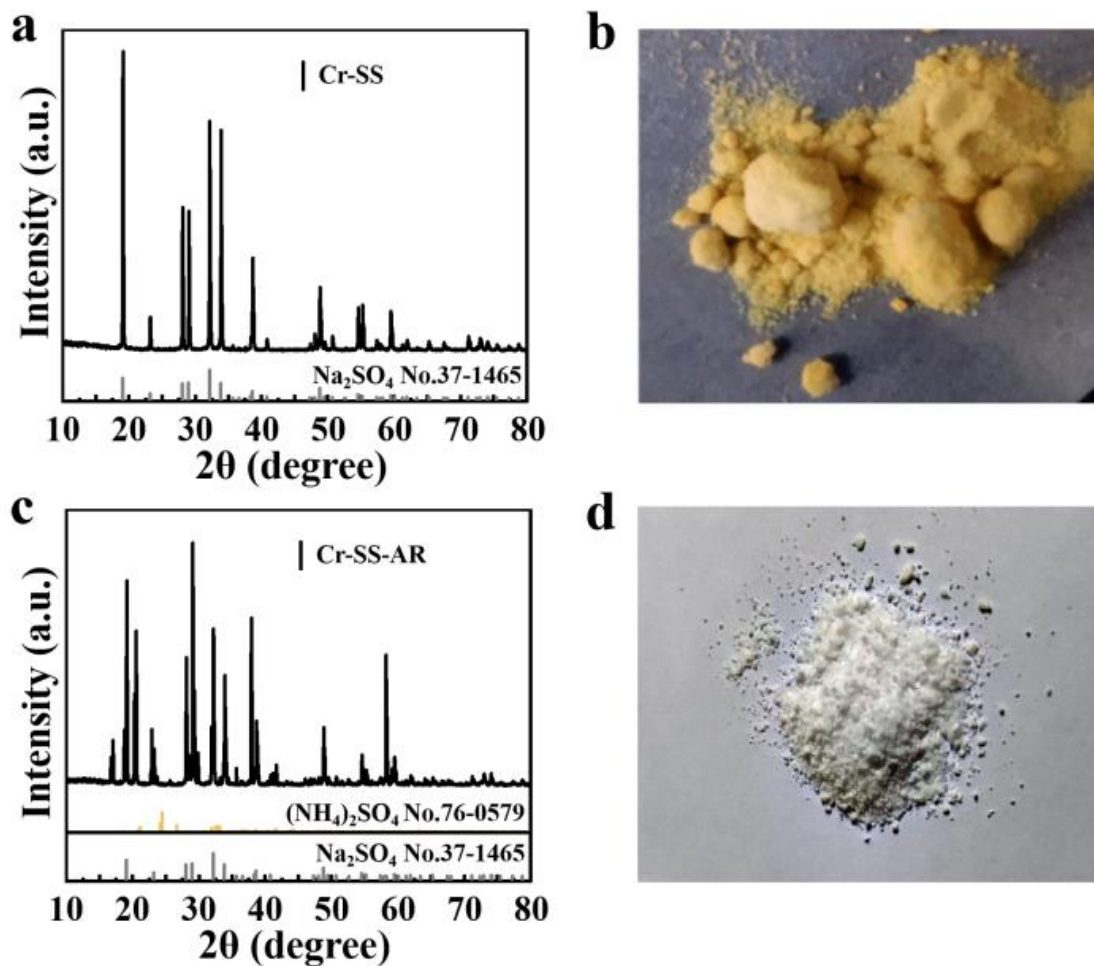

Fig. S2 (a)XRD pattern, (b) optical image of Cr-SS.  
(c)XRD pattern, (d) optical image of Cr-SS-AR.

Table S1 Cr content in the Cr-SS before and after treatment.

| Sample   | Cr concentration (mg/L) | Fe concentration (mg/L) |
|----------|-------------------------|-------------------------|
| Cr-SS    | $4.11958 \times 10$     | 0                       |
| Cr-SS-AR | $1.27 \times 10^{-2}$   | 0                       |

Table S2 The comparison between the traditional and this paper in Cr removal from Cr-containing wastes

| Cr-containing wastes                | Treatment method                                                                                    | Cr removal rate (%) | Reaction product                                                           | Reference              |
|-------------------------------------|-----------------------------------------------------------------------------------------------------|---------------------|----------------------------------------------------------------------------|------------------------|
| Chromium ore processing residue     | FeSO <sub>4</sub> hydrothermal treatment                                                            | 99.9                | FeCr <sub>2</sub> O <sub>4</sub>                                           | Lan et al., 2022 [1]   |
| Chromium ore processing residue     | (NH <sub>4</sub> ) <sub>2</sub> SO <sub>4</sub> roasting<br>H <sub>2</sub> SO <sub>4</sub> leaching | 95.39               | Na <sub>2</sub> Cr <sub>2</sub> O <sub>7</sub>                             | Zhang et al., 2022 [2] |
| Chromium ore processing residue     | Chlorination roasting                                                                               | 99.9                | MgCr <sub>2</sub> O <sub>4</sub>                                           | Zhou et al., 2021 [3]  |
| Cr-containing electroplating sludge | hydrothermal treatment                                                                              | 95                  | FeCr <sub>2</sub> O <sub>4</sub>                                           | Xie et al., 2022 [4]   |
| Chromium ore processing residue     | glass-ceramic immobilization                                                                        | 77                  | MgCr <sub>1.32</sub> Fe <sub>0.19</sub> -Al <sub>0.49</sub> O <sub>4</sub> | Liao et al., 2017 [5]  |
| <b>Cr-containing sulfate waste</b>  | <b>hydrothermal treatment</b>                                                                       | <b>99.9</b>         | <b>FeCrO<sub>3</sub></b>                                                   | <b>This paper</b>      |

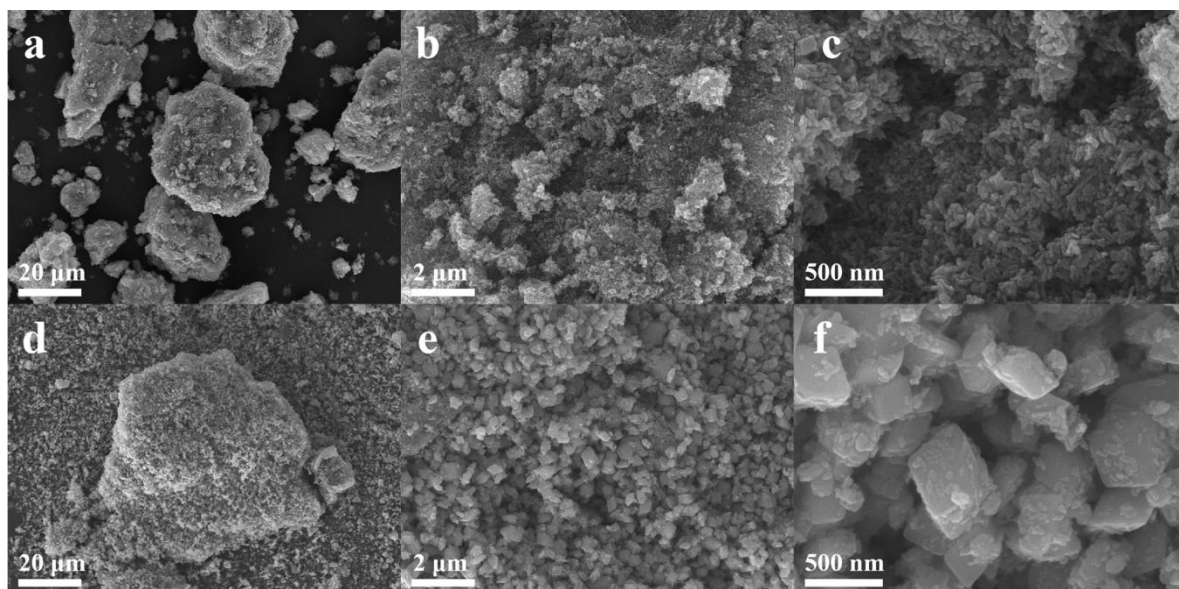

Fig. S3 The overall morphology of (a - c) FeOOH and (d - f) FeCrO<sub>3</sub>/FeOOH.

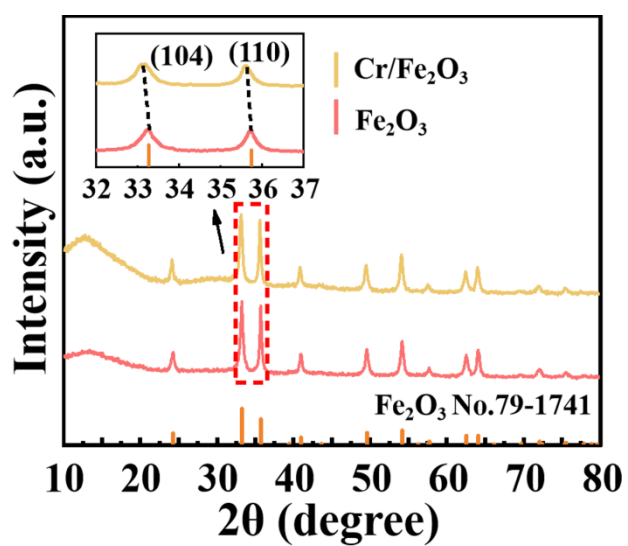

Fig. S4 XRD pattern of Fe<sub>2</sub>O<sub>3</sub> and Cr/Fe<sub>2</sub>O<sub>3</sub>.

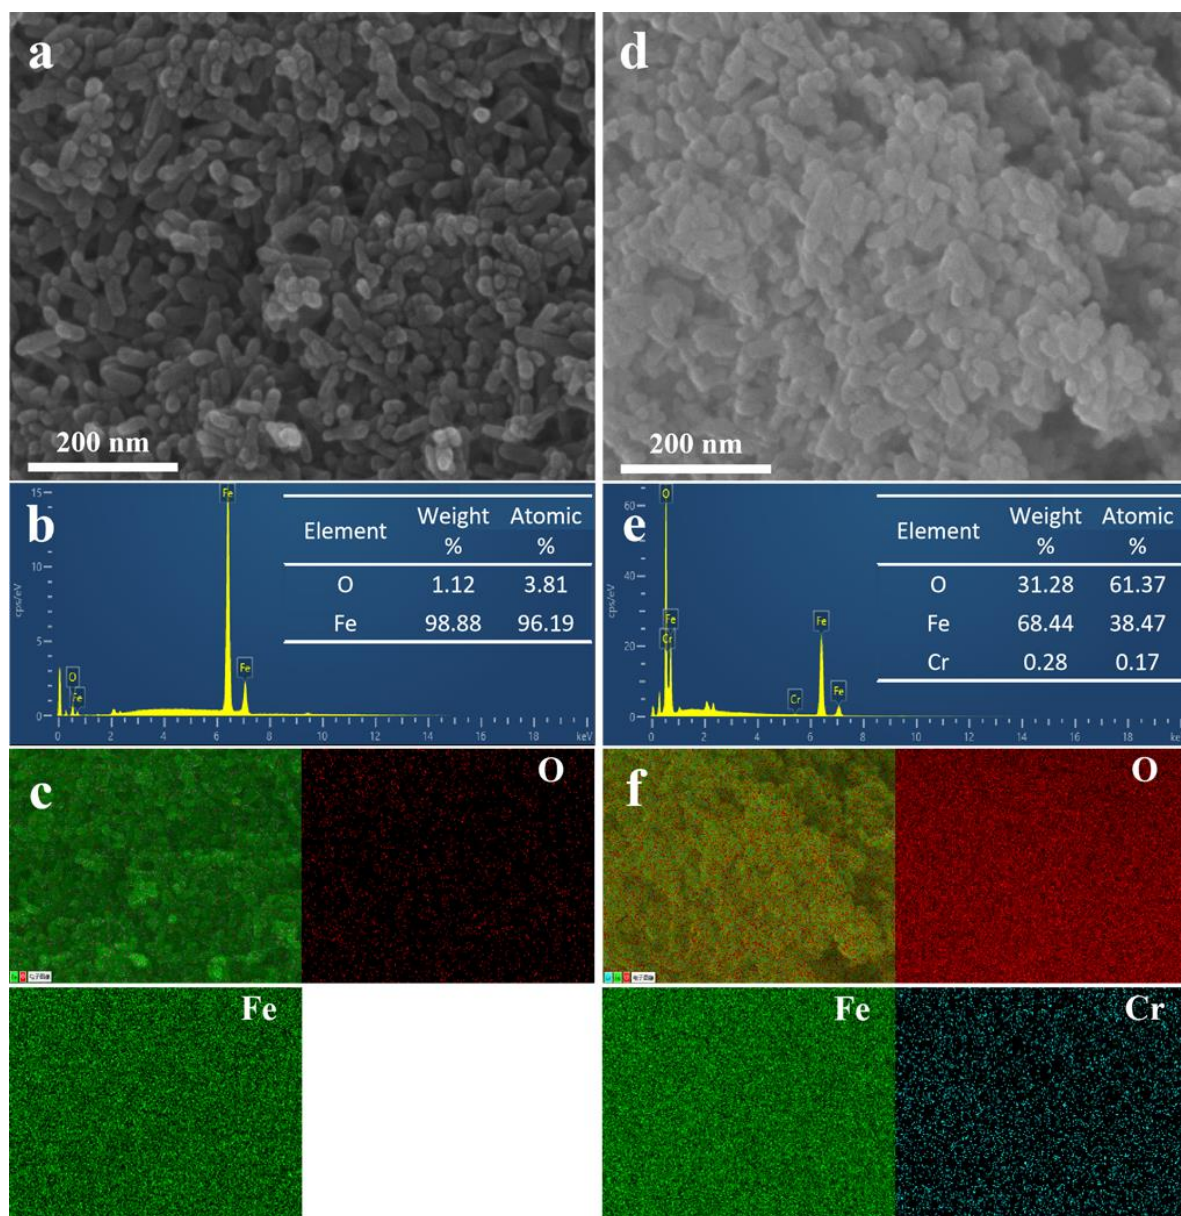

Fig. S5. SEM-EDX images (a, b, c) of  $\text{Fe}_2\text{O}_3$  and SEM-EDX spectra (d, e, f) of  $\text{Cr}/\text{Fe}_2\text{O}_3$ .

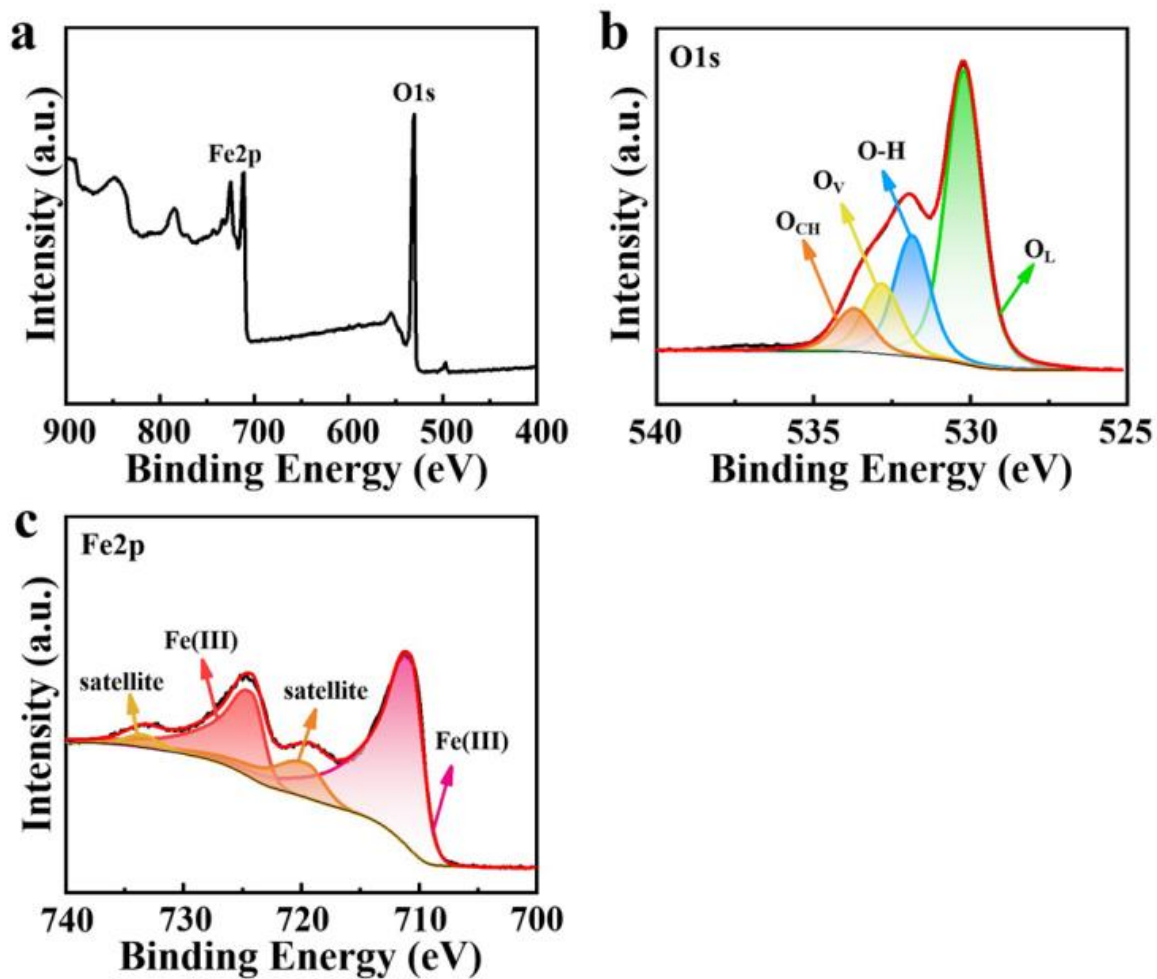

Fig. S6. XPS spectra of Fe<sub>2</sub>O<sub>3</sub>. (a) full survey spectrum, (b) O 1s and (c) Fe 2p.



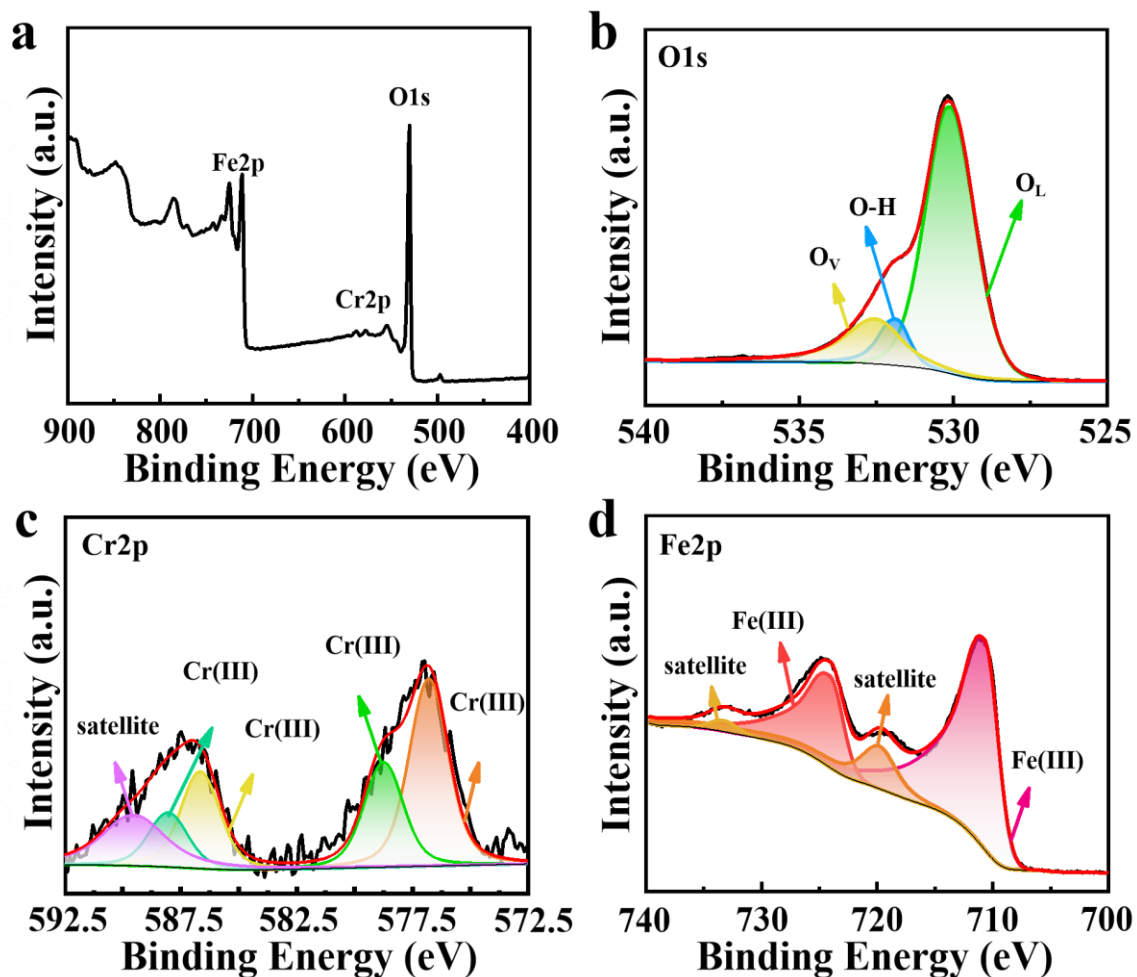

Fig. S7. XPS spectra of Cr/Fe<sub>2</sub>O<sub>3</sub>. (a) full survey spectrum, (b) O 1s, (c) Cr 2p and (d) Fe 2p.

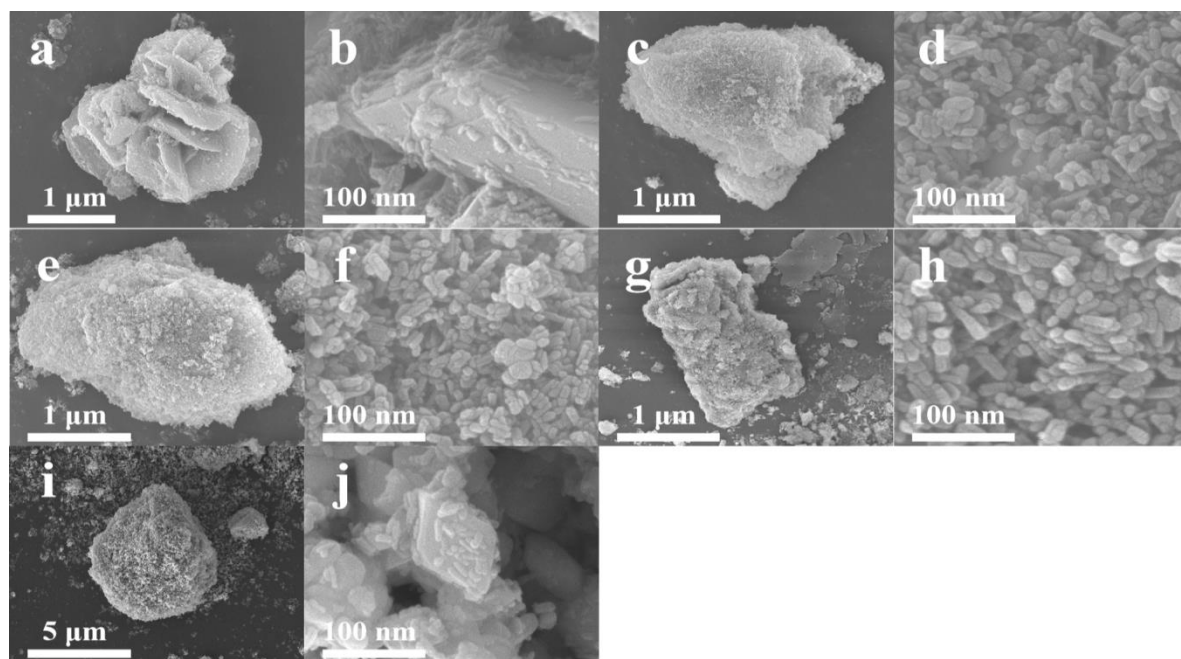

Fig. S8 SEM images of Cr-SS hydrothermal treatment for (a,b) 0.5 h, (c,d) 2 h, (e,f) 4 h, (g,h) 8 h and (i,j) 12 h.

During the hydrothermal reaction progression, Fe<sup>3+</sup> undergoes conversion to Fe(OH)<sub>3</sub> in an

alkaline setting, serving as the precursor for the initial ferrite material formation. With prolonged hydrothermal time, the transformation of  $\text{Fe}(\text{OH})_3$  to  $\text{FeOOH}$  occurs, leading to the growth of  $\text{FeOOH}$  on the ferrite surface and the development of uniformly dispersed short rod-like crystals. After exceeding 8 h and reaching 12 h of hydrothermal treatment, the short rod-like crystals evolve into regular hexahedral crystals, resulting in a complete alteration of the ferrite surface morphology.

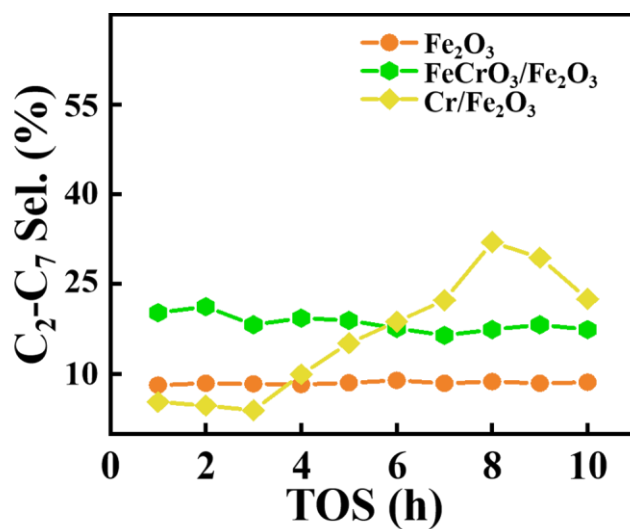

Fig. S9  $\text{C}_2$  -  $\text{C}_7$  products selectivity of  $\text{Fe}_2\text{O}_3$ ,  $\text{FeCrO}_3/\text{Fe}_2\text{O}_3$ , and  $\text{Cr}/\text{Fe}_2\text{O}_3$ .



Table S3. The comparison of CO<sub>2</sub> hydrogenation performance of different catalysts

| Catalysts                                            | Reaction temperature (°C) | CO <sub>2</sub> conversion (%) | CH <sub>4</sub> selective (%) | Selectivity of C <sub>2</sub> -C <sub>7</sub> products (%) | Reference                   |
|------------------------------------------------------|---------------------------|--------------------------------|-------------------------------|------------------------------------------------------------|-----------------------------|
| FeZnK/ZrO <sub>2</sub>                               | 300                       | 8.0                            | 45.0                          | -                                                          | Pasupulety et al., 2024 [6] |
| CoCe-GC                                              | 600                       | 23.4                           | 37.4                          | -                                                          | Xie et al., 2023 [7]        |
| 2% Pt/ZrO <sub>2</sub>                               | 300                       | 18                             | 1.7                           | -                                                          | Seuser et al., 2023 [8]     |
| 1% Fe/13X                                            | 400                       | 10                             | 22                            | -                                                          | Franken et al., 2020 [9]    |
| 10% Ir/In <sub>2</sub> O <sub>3</sub>                | 200                       | 17.7                           | -                             | 70                                                         | Shen et al., 2021 [10]      |
| Commercial Fe-Cr based catalyst                      | 400                       | 35                             | 60                            | 20                                                         | -                           |
| <b>FeCrO<sub>3</sub>/Fe<sub>2</sub>O<sub>3</sub></b> | <b>240</b>                | <b>12.4</b>                    | <b>45.9</b>                   | <b>24.4</b>                                                | <b>This paper</b>           |

Table S4 Different forms content and the RAC value of Cr in FeCrO<sub>3</sub>/Fe<sub>2</sub>O<sub>3</sub> and Cr/Fe<sub>2</sub>O<sub>3</sub>.

| Sample                                             | F1 (mg/kg)            | F2 (mg/kg)            | F3 (mg/kg)            | F4 (mg/kg)             | RAC value (%) |
|----------------------------------------------------|-----------------------|-----------------------|-----------------------|------------------------|---------------|
| Cr/Fe <sub>2</sub> O <sub>3</sub>                  | $2.27856 \times 10^2$ | $5.8158 \times 10^2$  | $2.10456 \times 10^2$ | $5.785625 \times 10^3$ | 3.348         |
| FeCrO <sub>3</sub> /Fe <sub>2</sub> O <sub>3</sub> | $8.2688 \times 10$    | $2.49368 \times 10^2$ | $1.80324 \times 10^2$ | $7.85875 \times 10^3$  | 0.988         |

Table S5 Chromium content in different valence states for FeCrO<sub>3</sub>/Fe<sub>2</sub>O<sub>3</sub> and Cr/Fe<sub>2</sub>O<sub>3</sub>.

| Sample                                             | Cr <sup>3+</sup> (mg/g) | Cr <sup>6+</sup> (mg/g) |
|----------------------------------------------------|-------------------------|-------------------------|
| FeCrO <sub>3</sub> /Fe <sub>2</sub> O <sub>3</sub> | 1.03                    | $1.2 \times 10^{-2}$    |
| Cr/Fe <sub>2</sub> O <sub>3</sub>                  | 1.08                    | -                       |

### Reference:

[1] Y. Lan, L. Zhang, X. Li, W. Liu, X. Su, Z. Lin, Efficient immobilization and utilization of chromite ore processing residue via hydrothermally constructing spinel phase Fe<sup>2+</sup>(Cr<sup>3+</sup><sub>x</sub>, Fe<sup>3+</sup><sub>2-x</sub>)O<sub>4</sub> and its magnetic separation, Sci. Total Environ. 813 (2022) 152637. <https://dx.doi.org/10.1016/j.scitotenv.2021.152637>

- [2] J. Zhang, W. Xie, S. Chu, Z. Liu, Z. Wu, Y. Lan, V.V. Galvita, L. Zhang, X. Su, Sufficient extraction of Cr from chromium ore processing residue (COPR) by selective Mg removal, *J. Hazard. Mater.* 440 (2022) 129754. <https://dx.doi.org/10.1016/j.jhazmat.2022.129754>
- [3] J. Zhou, X. Liu, J. Zheng, L. Li, W. Liu, L. Lin, Z. Lin, Simultaneous separation and immobilization of Cr(VI) from layered double hydroxide via reconstruction of the key phases, *J. Hazard. Mater.* 416 (2021) 125807. <https://dx.doi.org/10.1016/j.jhazmat.2021.125807>
- [4] D. Xie, S. Chu, S. Zhang, A. Ivanets, L. Zhang, X. Su, Facile synthesis of Cr-doped ferrite catalyst from Cr-containing electroplating sludge with activated persulfate for efficient degradation of tetracycline, *J. Environ. Chem. Eng.* 10 (2022). <https://dx.doi.org/10.1016/j.jece.2022.108805>
- [5] C.Z. Liao, Y. Tang, P.H. Lee, C. Liu, K. Shih, F. Li, Detoxification and immobilization of chromite ore processing residue in spinel-based glass-ceramic, *J. Hazard. Mater.* 321 (2017) 449-455. <https://dx.doi.org/10.1016/j.jhazmat.2016.09.035>
- [6] N. Pasupulety, A.A. Alzahrani, M.A. Daous, H. Alhumade, CO<sub>2</sub>-FT activity of Fe<sub>7</sub>C<sub>3</sub> in FeZnK/ZrO<sub>2</sub> catalysts synthesized by using citric acid: Effect of pretreatment gas, *Fuel*. 360 (2024). <https://dx.doi.org/10.1016/j.fuel.2023.130596>
- [7] H. Xie, N. Liu, J. Huang, S. Chen, G. Zhou, CoCe composite catalyst for the CH<sub>4</sub>/CO<sub>2</sub> reforming reaction: Synergistic effects between Co and Ce species, *J. Energy Inst.* 111 (2023). <https://dx.doi.org/10.1016/j.joei.2023.101389>
- [8] G. Seuser, M. Martinelli, E.S. Garcia, G.F. Upton, M. Ayala, J. Villarreal, Z. Rajabi, D.C. Cronauer, A.J. Kropf, G. Jacobs, Reverse water-gas shift: Na doping of m-ZrO<sub>2</sub> supported Pt for selectivity control, *Appl. Catal., A* 650 (2023). <https://dx.doi.org/10.1016/j.apcata.2022.119000>
- [9] T. Franken, A. Heel, Are Fe based catalysts an upcoming alternative to Ni in CO<sub>2</sub> methanation at elevated pressure?, *J. CO<sub>2</sub> Util.* 39 (2020). <https://dx.doi.org/10.1016/j.jcou.2020.101175>
- [10] C. Shen, K. Sun, Z. Zhang, N. Rui, X. Jia, D. Mei, C.-j. Liu, Highly Active Ir/In<sub>2</sub>O<sub>3</sub> Catalysts for Selective Hydrogenation of CO<sub>2</sub> to Methanol: Experimental and Theoretical Studies, *ACS Catal.* 11 (2021) 4036-4046. <https://dx.doi.org/10.1021/acscatal.0c05628>
